# Supplementary material for: Single-cell mapping of DNA G-quadruplex structures in human cancer cells
Source: PubMed Central journal article supplement (PMC8654944; doi:10.1038/s41598-021-02943-3), 2021-12-08
Supplement: 41598_2021_2943_MOESM1_ESM.pdf [file 41598_2021_2943_MOESM1_ESM.pdf]

1 **Single-cell mapping of DNA G-quadruplex structures in human cancer cells**

2 Winnie W.I. Hui<sup>1</sup>, Angela Simeone<sup>1</sup>, Katherine G. Zyner<sup>1</sup>, David Tannahill<sup>1</sup>, Shankar

3 Balasubramanian<sup>1,2,3\*</sup>

4 <sup>1</sup> Cancer Research UK Cambridge Institute, University of Cambridge, Li Ka Shing Centre,  
5 Robinson Way, Cambridge CB2 0RE, UK.

6 <sup>2</sup> Yusuf Hamied Department of Chemistry, University of Cambridge, Cambridge, CB2 1EW,  
7 UK

8 <sup>3</sup> School of Clinical Medicine, University of Cambridge, Cambridge, CB2 0SP, UK

9 \*e-mail: sb10031@cam.ac.uk

10  
11

**Table of contents**

12

13 **List of Supplementary Tables..... 2**

14 **Supplementary Methods ..... 3**

15 Cell Culture..... 3

16 BG4 scFv antibody generation ..... 3

17 Transposome preparation. .... 4

18 Bulk G4-CUT&Tag..... 7

19 Bulk G4-CUT&Tag data processing. .... 9

20 **Supplementary Figures ..... 11**

21 Supplementary Fig. S1 | Comparison of G4-CUT&Tag libraries relative to negative  
22 controls. .... 11

23 Supplementary Fig. S2 | Single-nuclei G4-CUT&Tag can identify separate cell types in a  
24 mixed population. .... 12

25 Supplementary Fig. S3 | Subtypes of G4s in snG4-CUT&Tag data of mixed U2OS and  
26 MCF7 cells. .... 13

27 **References..... 14**

28  
29

30 **List of Supplementary Tables**

31

32 **Supplementary Table S1 | Basic statistics of bulk G4-CUT&Tag data**

33 Basic alignment and peak statistics of individual bulk G4-CUT&Tag libraries and consensus  
34 regions called from replicates of each cell line (K562, U2OS and MCF7). This table shows  
35 the number of mapped reads, duplication rate, number of peaks called by SEACR and their  
36 overlapping with reference dataset, and the fraction of reads in peak (FRiP).

37

38 **Supplementary Table S2 | Basic statistics of single-nuclei G4-CUT&Tag data**

39 Basic alignment, cell calling and peak statistics of individual snG4-CUT&Tag libraries. This  
40 table includes the number of cells identified by Cell Ranger, number of fragments per cell,  
41 number of Cell Ranger peaks and their overlapping with reference dataset, and sequenced  
42 read statistics.

43

44 **Supplementary Table S3 | Top 50 differentially enriched promoter G4 peaks**

45 This table includes a list of top 50 genes with differentially enriched promoter G4 peaks  
46 between two clusters from snG4-CUT&Tag data in the mixed MCF7+U2OS sample obtained  
47 from 10X Genomics Loupe Browser 5.0.1 and their relative copy number from DepMap  
48 dataset for each cell line.

49 **Supplementary Methods**

50

51 **Cell Culture**

52 K562 cells (RRID:CVCL\_0004) were cultured in RPMI 1640 (Gibco, 21875034)  
53 supplemented with 10% heat-inactivated fetal bovine serum (FBS, Gibco, A3840401). U2OS  
54 cells (RRID:CVCL\_0042) were cultured in DMEM (Gibco, 41966029), 10% FBS. MCF7  
55 cells (RRID:CVCL\_0031) were cultured in DMEM, 10% FBS, 1% Penicillin-Streptomycin  
56 (Gibco, 15070063). Cell lines were maintained at 37 °C with 5% CO<sub>2</sub>. All cell lines were  
57 authenticated using short tandem repeat (STR) DNA profiling and tested negative for  
58 mycoplasma contamination by qPCR.

59

60 **BG4 scFv antibody generation**

61 The BG4 scFv antibody was expressed, purified and validated essentially as described  
62 previously<sup>1,2</sup>. pSANG10-3F-BG4 (Addgene plasmid #55756) was transformed to BL21  
63 (DE3) competent *E. coli* (NEB, C2527) and inoculated in 2X YT medium (Formedium,  
64 YDB0102) with 50µg/mL kanamycin and 2% glucose and incubated at 30°C overnight at  
65 200rpm. 200µL of the overnight culture was grown in 100mL auto-induction media  
66 ZYM5052 (2mM MgSO<sub>4</sub>, 0.2X metal mix, 1X 5052, 1X M and 50µg/mL kanamycin in ZY  
67 medium (10g N-Z amine AS (Sigma-Aldrich, N4517), 5g yeast extract (ForMedium, YEA03)  
68 in 1 litre water) at 37°C for 6h at 250rpm then incubated overnight at 25°C at 280rpm. Cells  
69 were harvested by centrifugation at 4°C for 30min at 4,000xg. Cell pellets were resuspended  
70 in 8mL ice-cold TES (50mM Tris-HCl pH8.0, 1mM EDTA pH 8.0, 20% sucrose in water and  
71 filtered) and left on ice for 10min. 12mL of 1:5 diluted ice-cold TES (1:5 TES diluted in  
72 300mL MilliQ water with 28µL benzonase (Sigma, E1014-5KU) and 2mM MgSO<sub>4</sub>) was  
73 added and left on ice for 15min. The cell suspension was centrifuged at 4°C for 10min at

74 8,000xg and the supernatant filtered through a 0.45µm protein low-bind membrane  
75 (Millipore, SLHV033RS). The supernatant was incubated with PBS-equilibrated HIS-select  
76 Nickel Affinity Gel beads (Millipore, P6611; approximately 0.5mL beads for 100mL culture  
77 in auto-induction media) at room temperature for 1h and rotated gently. Samples were loaded  
78 onto Proteus '1-Step Batch' Midi Spin Columns (Neo Biotech, NB-45-00058-2) and washed  
79 twice with 100mM NaCl, 10mM imidazole in PBS pH8. BG4 antibody was eluted with 700-  
80 1000µL elution buffer (250mM imidazole in PBS pH8.0) and dialyzed twice at 4°C overnight  
81 against filtered PBS using Maxi GeBaFlex dialysis tubes (Generon, D045). Aliquots were  
82 snap-frozen and stored at -80°C. The size and concentration of the BG4 antibody were  
83 determined by PAGE analysis. Affinity and specificity were determined by standard ELISA  
84 methods<sup>2</sup>.

85

### 86 **Transposome preparation**

87 As the BG4 scFv construct is FLAG-tagged, we first removed the three tandem FLAG-tag  
88 motifs from the 3XFlag-pA-Tn5-F1 plasmid (a kind gift from Steven Henikoff. Addgene  
89 plasmid #124601; <http://n2t.net/addgene:124601>; RRID:Addgene\_124601). 1µg of 3XFlag-  
90 pA-Tn5-F1 plasmid DNA was digested with NcoI-HF (NEB, R3193S) and HindIII-HF (NEB,  
91 R3104S) in 1X CutSmart Buffer (NEB, B7204S) at 37°C for 30min. Following incubation at  
92 80°C for 20min, the digested plasmid was dephosphorylated with rSAP (NEB, M0371S) in  
93 1X CutSmart Buffer at 37°C for 30min. After inactivating the enzyme at 65°C for 5min, the  
94 digested and dephosphorylated plasmid was purified from a 1% agarose gel using QIAquick  
95 Gel Extraction Kit (QIAGEN, 28704) according to the manufacturer's instructions. The  
96 digested plasmid was then ligated to the following annealed and phosphorylated  
97 oligonucleotides (All oligonucleotides were purchased from Sigma):

98 5'-CATGGGTATGACCATGATTACGCCA-3'

99 5'-AGCTTGGCGTAATCATGGTCATACC-3'

100 100µM of oligonucleotides were phosphorylated using T4 PNK (NEB, M0201S) in 1X T4  
101 DNA ligase buffer (NEB, B0202A) at 37°C for 30min. Annealing was performed by heating  
102 to 95°C for 5min, followed by cooling at 2°C per min for 38 cycles. ~ 50ng of digested  
103 3XFlag-pA-Tn5-Fl plasmid and ~ 506.5pg of annealed oligonucleotides were ligated using  
104 T4 DNA ligase (NEB, M0202S) in 1X T4 DNA ligase buffer (NEB, B0202A) at 25°C for  
105 10min. The ligated plasmid was transformed to NEB® 5-alpha competent *E. coli* (NEB,  
106 C2987H) following the manufacturer's protocol. Colonies were incubated in LB media,  
107 100µg/mL ampicillin and plasmid DNA were extracted using QIAprep Miniprep Kit  
108 (QIAGEN, 27106). Plasmids were screened for insertion by restriction enzyme digestion  
109 using BamHI-HF (NEB, R3136S) and BspDI (NEB, R0557S) and confirmed by Sanger  
110 sequencing (Eurofins).

111

112 The pA-Tn5 fusion plasmid lacking FLAG tags was transformed to C3013I cells (NEB) and  
113 expressed essentially as described by Kaya-Okur *et al.*<sup>3</sup> Bacteria were inoculated into 15mL  
114 LB broth, 100µg/mL carbenicillin (Invitrogen, 10177012) and shaken at 250rpm at 37°C for  
115 4h before adding to 1L of pre-warmed LB broth, 100µg/mL carbenicillin and culturing. At  
116 OD<sub>600</sub> ~0.7, the culture was cooled to 4°C for 1h in the cold room before addition of 250µl  
117 1M IPTG (Thermo Scientific, R0392). Culturing was then continued at 200rpm, 18°C  
118 overnight. Bacterial pellets were collected by centrifugation at 9,500xg at 4°C for 1h and  
119 resuspended in 100mL chilled HEGX+PI (0.02M HEPES-KOH pH7.2, 1M NaCl, 0.001M  
120 EDTA, 10% glycerol, 0.2% Triton X-100, water, Roche Complete Protease Inhibitor EDTA-  
121 free tablet) in the cold room. Bacteria were lysed by sonication on ice using a Fisher Probe  
122 Sonicator (Fisher Scientific, FB705) with the following settings: Amp 20, Process time  
123 00:04:00 (= eight cycles), Pulse ON 30 sec, Pulse OFF 1min. After eight cycles, the ice was

124 replaced and the sonication process was repeated. 100mL of lysed bacterial resuspension was  
125 centrifuged at 16,000xg at 4°C for 30min and supernatant harvested. In the cold room, 2.5mL  
126 fully resuspended chitin resin (NEB, S6651S) was added to five Econo-Pac Chromatography  
127 Columns (BIORAD, 732-1010) and washed in 20mL HEGX+PI. The bacterial supernatant  
128 was added, and the column sealed before incubating overnight at 4°C on a nutator. The next  
129 day, the unbound fraction was removed and the resin was washed twice with 20mL  
130 HEGX+PI. 6mL of HEGX, 100mM DTT was added and the column sealed again and  
131 incubated at 4°C on a nutator for 48h. The eluate was collected and added to a Slide-A-Lyzer  
132 10K MWCO dialysis cassette (Thermo Scientific, PI66830) and dialyzed against 2.5L 2X  
133 Tn5 dialysis buffer (0.1M HEPES-KOH pH7.2, 0.2M NaCl, 0.2mM EDTA, 1.7mM DTT,  
134 0.2% Triton X-100, 20% glycerol, water), 1.7mM DTT. After 1.5h, the cassette was placed  
135 into fresh 2.5L 2X Tn5 dialysis buffer, 1.7mM DTT and incubated in the cold room  
136 overnight. 18mL of dialyzed protein was recovered and concentrated by centrifugation at  
137 2,880xg at 4°C for ~1h using two Amicon Ultra-15 Centrifugal Filter Units (Merck,  
138 UFC901008). 4.3mL of concentrated protein was mixed with 4.3mL 80% glycerol and stored  
139 at -20°C. The size and concentration of purified pA-Tn5 fusion protein was measured using  
140 reducing PAGE on 4-12% Bis-Tris NUPAGE gels (Invitrogen, NP0321) according to the  
141 manufacturer with BSA (Pierce, 23209) as standards.

142

143 The transposome was then generated by incubating annealed MEDS oligonucleotides<sup>4</sup> with  
144 the pA-Tn5 fusion protein as described by Kaya-Okur *et al.*<sup>3</sup>. 200µL of 200µM Tn5MErev  
145 (5'-[phos]CTGTCTCTTATACACATCT-3') was annealed with 200µL of 200µM Tn5ME-A  
146 (5'- TCGTCGGCAGCGTCAGATGTGTATAAGAGACAG-3') or 200µL of 200µM  
147 Tn5ME-B (5'- GTCTCGTGGGCTCGGAGATGTGTATAAGAGACAG-3') in annealing  
148 buffer (10mM Tris-HCl pH8.0, 50mM NaCl, 1mM EDTA pH8.0 in water). 8µL of 100µM

149 pre-annealed MErev/ME-A and 8 $\mu$ L of 100 $\mu$ M pre-annealed MErev/ME-B were mixed with  
150 100 $\mu$ L pA-Tn5 fusion protein incubated on a rotator for 1h at room temperature, and stored at  
151 -20°C.

152

### 153 **Bulk G4-CUT&Tag**

154 The CUT&Tag protocol described in Kaya-Okur *et al.*<sup>3</sup> for multi-cell (bulk) samples was  
155 adapted for G4 DNA secondary structures.

156 *Cell preparation.* U2OS cells were detached using accutase (Gibco, A1110501). Detached

157 U2OS and K562 suspension cells were harvested by centrifugation and 100,000 cells per

158 reaction were resuspended in 0.1% formaldehyde in PBS (Thermo Scientific, 28906) for

159 2min at room temperature, followed by quenching with glycine to a final concentration of

160 0.075M. Fixed cells were centrifuged at 1,300xg at 4°C for 4min and resuspended in wash

161 buffer (20mM HEPES pH7.5, 150mM KCl, 0.5mM spermidine (Sigma, S0266)) in nuclease-

162 free water with a Roche Complete Protease Inhibitor EDTA-free tablet (Sigma,

163 11873580001) at 1000 cells/ $\mu$ L. For experiments comparing different cell numbers, cell

164 concentration was measured again at this point.

165 *Bead capture.* For seven samples, 70 $\mu$ L concanavalin A beads (Bangs Labs, BP531) were

166 washed twice in 1-1.5mL binding buffer (20mM HEPES pH7.5, 10mM KCl, 1mM CaCl<sub>2</sub>,

167 1mM MnCl<sub>2</sub> in nuclease-free water) and resuspended in 70 $\mu$ L binding buffer. 100 $\mu$ L of cell

168 suspension was incubated with 10 $\mu$ L pre-washed concanavalin A beads in 1.5mL tube at

169 25°C for 10min at 600rpm. Cells bound to beads were washed twice in wash buffer using a

170 magnetic rack (Invitrogen, 12321D) to capture the beads, before resuspending in 50 $\mu$ L

171 antibody buffer (2mM EDTA, 0.1% BSA (Sigma, A8577), 0.05% digitonin (EMD Millipore,

172 300410) in wash buffer).

173 *Tagmentation.* 4 $\mu$ L of 5.4 $\mu$ M BG4 scFv was added to each sample and incubated at 25°C for  
174 2h at 600rpm. Cells were washed twice with 100 $\mu$ L dig-wash buffer (0.05% digitonin in  
175 wash buffer) and resuspended in 50 $\mu$ L dig-wash buffer. 2 $\mu$ L of rabbit anti-FLAG antibody  
176 (Cell Signaling Technology Cat# 2368, RRID:AB\_2217020) was then added and incubated at  
177 25°C for 1h at 600rpm, followed by three washes in 500 $\mu$ L dig-wash buffer and resuspension  
178 in 50 $\mu$ L dig-wash buffer. Next, 0.5 $\mu$ L of anti-rabbit antibody (Antibodies-Online Cat#  
179 ABIN101961, RRID:AB\_10775589) was added and incubated at 25°C for 1h at 600rpm.  
180 After 3 washes with 500 $\mu$ L dig-wash buffer, cells were incubated in 1:250 pA-Tn5 in 50 $\mu$ L  
181 Dig-300 buffer (20mM HEPES pH7.5, 300mM KCl, 0.5mM spermidine, 0.01% digitonin in  
182 nuclease-free water with a Roche Complete Protease Inhibitor EDTA-free tablet) at 25°C for  
183 1h at 600rpm. Cells were then washed 3X in 500 $\mu$ L Dig-300 buffer before incubation in  
184 300 $\mu$ L tagmentation buffer (10mM MgCl<sub>2</sub> in Dig-300 buffer) at 37°C for 1h at 600rpm.

185 *DNA extraction.* After tagmentation, cells were washed twice with 500 $\mu$ L TAPS wash buffer  
186 (10mM TAPS (Alfa Aesar, J63268.AE), 0.2mM EDTA in nuclease-free water). 100 $\mu$ L of  
187 extraction buffer (0.5mg/mL proteinase K (Thermo Scientific, EO0491), 0.5% SDS in 10mM  
188 Tris-HCl pH8.0) was added, vortexed and incubated at 55°C for 1h at 800rpm. 100 $\mu$ L phenol-  
189 chloroform-isoamyl alcohol (Invitrogen, 15593049) was added and mixed. The mixture was  
190 transferred to MaXtract High Density Tube (QIAGEN, 129046) and centrifuged at room  
191 temperature for 3min at 16,000xg. 100 $\mu$ L chloroform was added to the top aqueous phase,  
192 mixed by inverting the phase-lock tubes ten times and then centrifuged at room temperature  
193 for 3min at 16,000xg. The top aqueous layer was transferred to a 1.5mL DNA Lo-bind tube  
194 (Eppendorf, 022431021). 4 $\mu$ L 5M NaCl and 200 $\mu$ L cold 100% ethanol were added, mixed  
195 and incubated at -20°C overnight. Samples were then centrifuged at 4°C for 30min at  
196 21,130xg. The supernatant was carefully poured off and the DNA pellet rinsed with 1mL cold  
197 100% ethanol and centrifuged at 4°C for 2min at 21,130xg. After pouring off the wash and



198 draining the residual liquid with paper towel, the pellet was left to air-dry. The pellet was  
199 finally redissolved in 25 $\mu$ L elution buffer 1 (10mM Tris-HCl pH8, 1mM EDTA, 1/400  
200 RNAseA (Thermo Scientific, EN0531) in nuclease-free water) by vortexing and incubating at  
201 37°C for 10min at 800rpm.

202 *Library preparation.* In a 0.2mL PCR tube, 25 $\mu$ L NEBNext HiFi 2x PCR master mix (NEB,  
203 M0541), 2 $\mu$ L of 10 $\mu$ M Ad1<sup>4</sup>, 2 $\mu$ L of 10 $\mu$ M Ad2<sup>4</sup> and 21 $\mu$ L tagmented DNA were added and  
204 subjected to PCR (72°C for 5 min, 98°C for 30s, followed by 10 cycles of 98°C for 10s and  
205 63°C for 10s, and one cycle of 72°C for 1 minute). Libraries were purified using 1.3X ratio  
206 (65 $\mu$ L) Ampure XP beads (Beckman Coulter, A63882). After 10min room temperature  
207 incubation, bead-bound DNA was washed twice with 80% ethanol and libraries eluted with  
208 25 $\mu$ L 10mM Tris-HCl for 5min at room temperature.

209 *Library sequencing.* Library size and concentration were measured using a TapeStation  
210 HSD1000 ScreenTape. Libraries were balanced and pooled for size selection using Ampure  
211 XP beads. 0.4X ratio of Ampure XP beads were added to pooled libraries and the supernatant  
212 transferred to a new tube after 15min at room temperature. 1.4X ratio of Ampure XP beads  
213 were then added to the supernatant and incubated for 15min at room temperature. Beads were  
214 washed twice with 80% ethanol and libraries eluted in 40 $\mu$ L 10mM Tris-HCl. Libraries were  
215 sequenced on a NextSeq 500 sequencer (Illumina) with a paired-end format of 36 bp x 2  
216 using the High Output kit (Illumina, FC-404-2005).

217

### 218 **Bulk G4-CUT&Tag data processing**

219 Sequencing quality was checked using FastQC. Bases with a quality score below 20 were  
220 trimmed from both reads using cutadapt (cutadapt -q 20). Resulting reads were aligned to  
221 hg38 with bwa mem. Aligned reads not overlapping the ENCODE blacklist were saved into

222 bam files (samtools view -Sb -F780 -q 10). Duplicate reads were removed using Picard  
223 (Picard MarkDuplicates) and deduplicated bam files sorted and indexed.

224 *Peak calling.* Deduplicated bam files were transformed into bedpe files (bedtools bamtoBED -  
225 bedpe) and then only fragments with size below 1000bp (awk '{if (\$1==\$4 && \$6-\$2 <  
226 1000) print \$0}') were retained. Next, coverage of <1000bp fragments across human genome  
227 was computed using bedtools genomecov and reported in bedgraph format. SEACR was then  
228 used to identify regions of local enrichments. SEACR stringent search was performed to  
229 select top 5% peaks based on total signal within peaks (SEACR\_1.3 \$bdg\_1000 0.05 non  
230 stringent). Peaks with a minimum coverage of eight reads were kept for further analysis.

231 *Consensus regions and reference comparisons.* Peaks obtained from individual libraries were  
232 combined together if replicates were available. Regions observed in both technical replicates  
233 (n=2) were selected as representative of the biological sample (multi2). When multiple  
234 biological replicates (i.e. different passages) were available, multi2 regions observed in a  
235 minimum two were used to generate consensus regions (bio). Regions of interest were  
236 compared to OQs<sup>5</sup> and previously reported G4 maps<sup>6,7</sup> by calculating the percentage of  
237 overlaps.

238 *Assessment of reproducibility and sensitivity.* To assess reproducibility and sensitivity, for  
239 different cell types, replicates and input cell number, the signal normalised to library size was  
240 computed for all libraries. First a super-set of consensus regions across all libraries was  
241 obtained by merging and sorting all consensus across various cell types/assay conditions.  
242 Signal in those regions was then computed (bedtools coverage) and normalised to the total  
243 library size (reads per million, CPM). All libraries CPM were combined together into a single  
244 matrix, z-score was calculated and rescaled between 0 and 1. The resulting z-scores, where 0  
245 indicate low and 1 high values, were used to perform unsupervised hierarchical clustering and  
246 to compute Spearman's rank correlations coefficients ( $r_s$ ).

247 **Supplementary Figures**

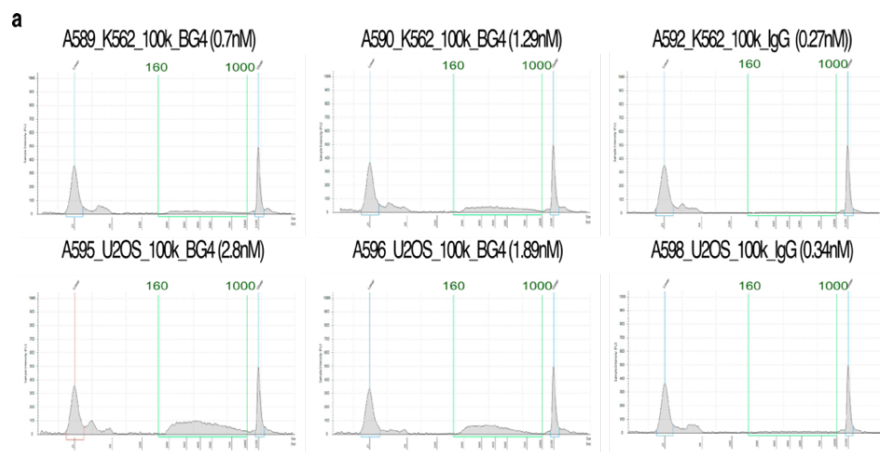

**b**

| id   | cell | ab1  | rep  | tech | lib pooled ( $\mu$ L) | mapped     | mapped_no_dup | perc_dup |
|------|------|------|------|------|-----------------------|------------|---------------|----------|
| A589 | K562 | bg4  | rep1 | tec1 | 5                     | 20,895,180 | 8,987,804     | 56.99    |
| A590 | K562 | bg4  | rep1 | tec2 | 3                     | 22,256,368 | 10,427,214    | 53.15    |
| A592 | K562 | None | rep1 | tecx | 14                    | 30,743,990 | 3,811,788     | 87.6     |
| A603 | K562 | bg4  | rep2 | tec1 | 6                     | 33,201,904 | 16,254,436    | 51.04    |
| A604 | K562 | bg4  | rep2 | tec2 | 4                     | 39,908,396 | 15,048,608    | 62.29    |
| A606 | K562 | None | rep2 | tecx | 13                    | 32,712,556 | 3,526,386     | 89.22    |
| A628 | K562 | bg4  | rep3 | tec1 | 1.5                   | 44,374,228 | 19,122,474    | 56.91    |
| A629 | K562 | bg4  | rep3 | tec2 | 1.9                   | 33,840,458 | 14,752,868    | 56.4     |
| A630 | K562 | None | rep3 | tecx | 5.7                   | 43,295,120 | 2,865,564     | 93.38    |
| A595 | U2OS | bg4  | rep1 | tec1 | 1                     | 17,726,964 | 12,277,176    | 30.74    |
| A596 | U2OS | bg4  | rep1 | tec2 | 2                     | 24,482,550 | 16,030,870    | 34.52    |
| A598 | U2OS | None | rep1 | tecx | 11                    | 17,415,784 | 3,217,264     | 81.53    |
| A609 | U2OS | bg4  | rep2 | tec1 | 2                     | 24,295,626 | 13,588,332    | 44.07    |
| A610 | U2OS | bg4  | rep2 | tec2 | 2                     | 22,881,106 | 12,590,316    | 44.98    |
| A611 | U2OS | None | rep2 | tecx | 20                    | 34,999,250 | 3,577,146     | 89.78    |
| A632 | U2OS | bg4  | rep3 | tec1 | 0.7                   | 32,453,716 | 18,913,320    | 41.72    |
| A633 | U2OS | bg4  | rep3 | tec2 | 2                     | 30,511,232 | 16,803,610    | 44.93    |
| A634 | U2OS | None | rep3 | tecx | 10.2                  | 53,757,750 | 3,179,388     | 94.09    |

248

249 **Supplementary Fig. S1 | Comparison of G4-CUT&Tag libraries relative to negative**

250 **controls.** For each biological replicate, a negative control was included with the same

251 number of starting cells and PCR cycles without adding the BG4 scFv primary antibody. **a,**

252 Size profiles and library quantification measured using a TapeStation with High Sensitivity

253 D1000 ScreenTape (Agilent). x-axis: library size from 25bp to 1,500bp; y-axis: sample

254 intensity [FU]; green lines: indicate libraries ranged from 160bp to 1,000 bp. **b,** Basic

255 mapping statistics of K562 and U2OS G4-CUT&Tag and control libraries: the table reports

256 the primary antibody used (ab1), three biological replicates (rep1, rep2, rep3) with two

257 technical replicates (tec1, tec2) and one negative control (tecx) for K562 and U2OS cells,

258 total number of mapped reads (mapped), total number of mapped reads after duplicate

259 removal (mapped\_no\_dup) and the corresponding duplication rate (perc\_dup).

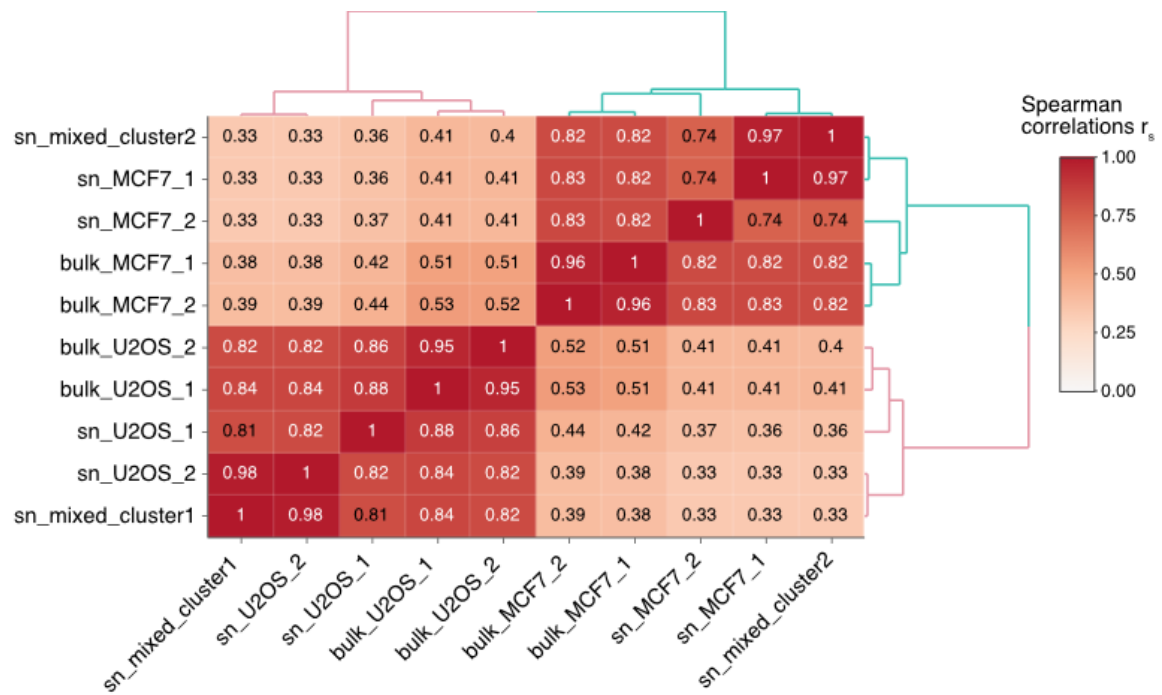

260

261 **Supplementary Fig. S2 | Single-nuclei G4-CUT&Tag can identify separate cell types in a**

262 **mixed population.** Hierarchical clustering of the Spearman correlation matrix of single-

263 nuclei and bulk G4-CUT&Tag replicates of U2OS and MCF7 cells. The column and row

264 names indicate individual single nuclei (sn\_) and bulk (bulk\_) replicates (U2OS\_1, U2OS\_2,

265 MCF7\_1, MCF7\_2) and the experiment where two cell lines have been mixed and then

266 identified as different clusters (sn\_mixed\_cluster1, sn\_mixed\_cluster2). Spearman

267 correlations between samples were computed based on the normalised read coverages at

268 SEACR G4 peaks identified after sequencing bulk data.

**a**

|                           | Min. | 1st Qu. | Median | Mean | 3rd Qu. | Max. | Number of regions |
|---------------------------|------|---------|--------|------|---------|------|-------------------|
| commonRegions_Ncells_U2OS | 1    | 17      | 25     | 28   | 35      | 348  | 491               |
| commonRegions_Ncells_MCF7 | 1    | 12      | 19     | 24   | 28      | 289  | 491               |
| specifRegions_Ncells_U2OS | 1    | 1       | 2      | 7    | 10      | 87   | 9810              |
| specifRegions_Ncells_MCF7 | 1    | 1       | 2      | 6    | 6       | 107  | 2361              |

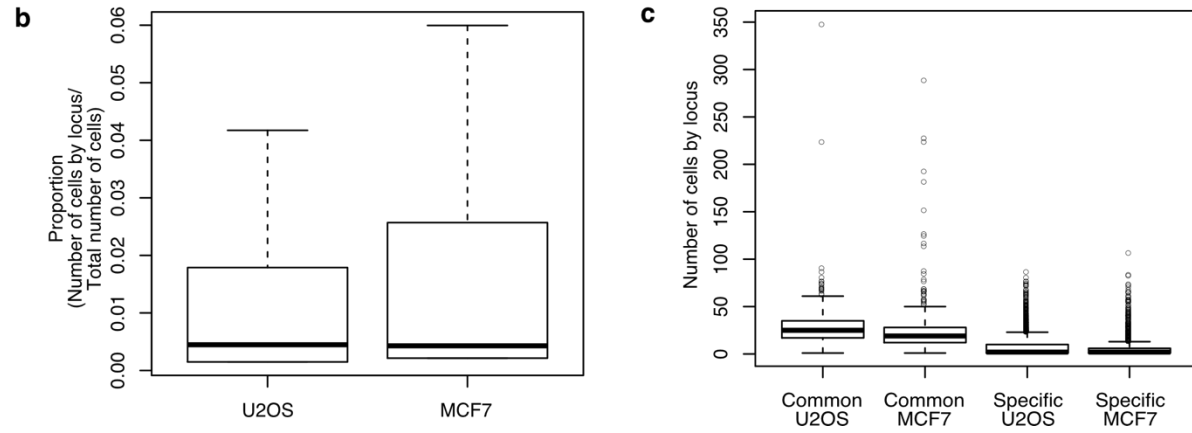

269

270 **Supplementary Fig. S3 | Subtypes of G4s in snG4-CUT&Tag data of mixed U2OS and**

271 **MCF7 cells. a**, Statistics on the number of cells supporting G4 peaks (based on peaks called

272 by MACS2 in aggregated data from each cluster) in two cell lines. **b**, Boxplot showing the

273 distribution of the proportion of cells at G4 peaks in both cell lines. The center line indicates

274 median, the lower and upper lines of the box correspond to the first and third quartiles, and

275 the upper and lower whiskers extend to the maximum value no further than 1.5x interquartile

276 range. **c**, Boxplot showing the distribution of the number of cells across G4 peaks: common

277 G4 peaks (regions observed in both U2OS and MCF7 cells), G4 peaks specific to U2OS cells

278 and G4 peaks specific to MCF7 cells. The center line indicates median, the lower and upper

279 lines of the box limits correspond to the first and third quartiles, and the upper and lower

280 whiskers extend to the maximum value no further than 1.5x interquartile range, with points

281 indicate potential outliers.

282

283 **References**

- 284 1 Biffi, G., Tannahill, D., McCafferty, J. & Balasubramanian, S. Quantitative  
285 visualization of DNA G-quadruplex structures in human cells. *Nat Chem* **5**, 182-186,  
286 doi:10.1038/nchem.1548 (2013).
- 287 2 Hänsel-Hertsch, R., Spiegel, J., Marsico, G., Tannahill, D. & Balasubramanian, S.  
288 Genome-wide mapping of endogenous G-quadruplex DNA structures by chromatin  
289 immunoprecipitation and high-throughput sequencing. *Nature Protocols* **13**, 551-564,  
290 doi:10.1038/nprot.2017.150 (2018).
- 291 3 Kaya-Okur, H. S. *et al.* CUT&Tag for efficient epigenomic profiling of small samples  
292 and single cells. *Nat Commun* **10**, 1930, doi:10.1038/s41467-019-09982-5 (2019).
- 293 4 Buenrostro, J. D. *et al.* Single-cell chromatin accessibility reveals principles of  
294 regulatory variation. *Nature* **523**, 486-490, doi:10.1038/nature14590 (2015).
- 295 5 Chambers, V. S. *et al.* High-throughput sequencing of DNA G-quadruplex structures  
296 in the human genome. *Nat Biotechnol* **33**, 877-881, doi:10.1038/nbt.3295 (2015).
- 297 6 Shen, J. *et al.* Promoter G-quadruplex folding precedes transcription and is controlled  
298 by chromatin. *Genome Biol* **22**, 143, doi:10.1186/s13059-021-02346-7 (2021).
- 299 7 Spiegel, J. *et al.* G-quadruplexes are transcription factor binding hubs in human  
300 chromatin. *Genome Biol* **22**, 117, doi:10.1186/s13059-021-02324-z (2021).

301
